# Supplementary material for: Anti-Tick Microbiota Vaccine Impacts Ixodes ricinus Performance during Feeding
Source: MDPI journal article supplement (doi:10.3390/vaccines8040702), 2020-11-21
Supplement: s1 [file s1]

| <b>Family</b>                     | <b>Relative abundance (%)</b> | <b>Eigencentality</b> |
|-----------------------------------|-------------------------------|-----------------------|
| Aeromonadaceae                    | 0.23                          | #N/A                  |
| Streptococcaceae                  | 0.23                          | #N/A                  |
| Lactobacillales                   | 0.06                          | #N/A                  |
| Intrasporangiaceae                | 0.04                          | #N/A                  |
| Saprospiraceae                    | 0.04                          | #N/A                  |
| Listeriaceae                      | 0.03                          | #N/A                  |
| env.OPS 17                        | 0.03                          | #N/A                  |
| Sphingobacteriaceae               | 0.03                          | #N/A                  |
| Frankiaceae                       | 0.02                          | #N/A                  |
| Brevibacteriaceae                 | 0.02                          | #N/A                  |
| Veillonellaceae                   | 0.02                          | #N/A                  |
| Mycobacteriaceae                  | 0.02                          | #N/A                  |
| Blastocatellaceae                 | 0.02                          | #N/A                  |
| Verrucomicrobiaceae               | 0.02                          | #N/A                  |
| Bdellovibrionaceae                | 0.02                          | #N/A                  |
| Hyphomicrobiaceae                 | 0.01                          | #N/A                  |
| Gaiellales                        | 0.01                          | #N/A                  |
| Gammaproteobacteria               | 0.01                          | #N/A                  |
| Solibacteraceae (Subgroup 3)      | 0.01                          | #N/A                  |
| Porphyromonadaceae                | 0.01                          | #N/A                  |
| Flavobacteriaceae                 | 0.01                          | #N/A                  |
| Kineosporiaceae                   | 0.01                          | #N/A                  |
| Cellulomonadaceae                 | 0.01                          | #N/A                  |
| Acidobacteriaceae (Subgroup 1)    | 0.01                          | #N/A                  |
| Family XIII                       | 0.01                          | #N/A                  |
| Christensenellaceae               | 0.01                          | #N/A                  |
| Opitutaceae                       | 0.01                          | #N/A                  |
| 67-14                             | 0.01                          | #N/A                  |
| Micrococcales                     | 0.01                          | #N/A                  |
| Rhodopirillaceae                  | 0.01                          | #N/A                  |
| Dermabacteraceae                  | 0.01                          | #N/A                  |
| Vibrionaceae                      | 0.01                          | #N/A                  |
| Acido.Subgroup 6                  | 0.01                          | #N/A                  |
| A4b                               | 0.01                          | #N/A                  |
| Cytophagaceae                     | 0.01                          | #N/A                  |
| Arcobacteraceae                   | 0.01                          | #N/A                  |
| Chroococcidiopsaceae              | 0.01                          | #N/A                  |
| Family X                          | 0.01                          | #N/A                  |
| Geodermatophilaceae               | 0.01                          | #N/A                  |
| Hydrogenophilaceae                | 0.01                          | #N/A                  |
| Solimonadaceae                    | 0.01                          | #N/A                  |
| KD4-96                            | 0.01                          | #N/A                  |
| SC-I-84                           | 0.01                          | #N/A                  |
| Muribaculaceae                    | 0.01                          | #N/A                  |
| Bacteroidales                     | 0.01                          | #N/A                  |
| uncultured Ferrimicrobium sp.     | 0.00                          | #N/A                  |
| Pedosphaeraceae                   | 0.00                          | #N/A                  |
| SJA-28                            | 0.00                          | #N/A                  |
| uncultured Chlorobiales bacterium | 0.00                          | #N/A                  |

|                                    |       |      |
|------------------------------------|-------|------|
| Family XII                         | 0.00  | #N/A |
| Mycoplasmataceae                   | 0.00  | #N/A |
| Nakamurellaceae                    | 0.00  | #N/A |
| Paracaedibacteraceae               | 0.00  | #N/A |
| Reyranellaceae                     | 0.00  | #N/A |
| Acidaminococcaceae                 | 0.00  | #N/A |
| Steroidobacteraceae                | 0.00  | #N/A |
| WD2101 soil group                  | 0.00  | #N/A |
| Gemmataceae                        | 0.00  | #N/A |
| Haliangiaceae                      | 0.00  | #N/A |
| Phormidiaceae                      | 0.00  | #N/A |
| Rhodocyclaceae                     | 0.00  | #N/A |
| Pla1 lineage                       | 0.00  | #N/A |
| Microscillaceae                    | 0.00  | #N/A |
| Betaproteobacteriales              | 0.00  | #N/A |
| Sporichthyaceae                    | 0.00  | #N/A |
| Marinifilaceae                     | 0.00  | #N/A |
| Acidimicrobiia                     | 0.00  | #N/A |
| Atopobiaceae                       | 0.00  | #N/A |
| Nocardiopsaceae                    | 0.00  | #N/A |
| Frankiales                         | 0.00  | #N/A |
| Micromonosporaceae                 | 0.00  | #N/A |
| Microtrichales                     | 0.00  | #N/A |
| ncultured Termite group 1 bacteriu | 0.00  | #N/A |
| Streptomycetaceae                  | 0.00  | #N/A |
| Gaiellaceae                        | 0.00  | #N/A |
| Paludibacteraceae                  | 0.00  | #N/A |
| Chitinophagales                    | 0.00  | #N/A |
| Devosiaceae                        | 0.00  | #N/A |
| Kaistiaceae                        | 0.00  | #N/A |
| Alphaproteobacteria                | 0.00  | #N/A |
| Archangiaceae                      | 0.00  | #N/A |
| Ectothiorhodospiraceae             | 0.00  | #N/A |
| Planococcaceae                     | 25.09 | 1.00 |
| Bifidobacteriaceae                 | 0.08  | 0.97 |
| Staphylococcaceae                  | 3.60  | 0.88 |
| Bacillaceae                        | 0.28  | 0.86 |
| Bogoriellaceae                     | 0.04  | 0.82 |
| Caulobacteraceae                   | 0.24  | 0.80 |
| Enterococcaceae                    | 1.32  | 0.79 |
| Corynebacteriaceae                 | 5.76  | 0.79 |
| Methylophilaceae                   | 0.03  | 0.77 |
| Burkholderiaceae                   | 6.28  | 0.73 |
| Erysipelotrichaceae                | 0.05  | 0.72 |
| Solirubrobacteraceae               | 0.05  | 0.72 |
| Anaplasmataceae                    | 0.62  | 0.72 |
| Paenibacillaceae                   | 0.08  | 0.71 |
| Sphingomonadaceae                  | 0.96  | 0.71 |
| Micrococcaceae                     | 0.29  | 0.69 |
| Enterobacteriaceae                 | 17.83 | 0.69 |

|                                  |       |      |
|----------------------------------|-------|------|
| Halomonadaceae                   | 0.07  | 0.69 |
| Dermacoccaceae                   | 0.64  | 0.69 |
| Nocardiodaceae                   | 0.03  | 0.68 |
| Microbacteriaceae                | 0.11  | 0.67 |
| Rhodanobacteraceae               | 0.20  | 0.67 |
| Aerococcaceae                    | 0.04  | 0.67 |
| Moraxellaceae                    | 15.86 | 0.65 |
| Xanthomonadaceae                 | 1.77  | 0.64 |
| Propionibacteriaceae             | 0.03  | 0.62 |
| Myxococcales                     | 0.02  | 0.60 |
| Nocardiaceae                     | 0.06  | 0.59 |
| Hymenobacteraceae                | 0.02  | 0.58 |
| Carnobacteriaceae                | 0.14  | 0.57 |
| Pseudonocardiaceae               | 0.03  | 0.57 |
| Rhizobiaceae                     | 0.44  | 0.57 |
| Xanthobacteraceae                | 0.09  | 0.57 |
| Lactobacillaceae                 | 0.08  | 0.54 |
| Rickettsiales                    | 0.16  | 0.53 |
| Oligoflexaceae                   | 0.23  | 0.53 |
| Clostridiaceae 1                 | 0.07  | 0.53 |
| Actinomycetaceae                 | 0.10  | 0.52 |
| Rhodobacteraceae                 | 0.09  | 0.50 |
| Beijerinckiaceae                 | 0.26  | 0.49 |
| Pirellulaceae                    | 0.00  | 0.49 |
| Acetobacteraceae                 | 0.23  | 0.49 |
| Neisseriaceae                    | 1.62  | 0.48 |
| Lachnospiraceae                  | 0.30  | 0.47 |
| Bacillales                       | 0.05  | 0.46 |
| Gastranaerophilales              | 0.00  | 0.46 |
| Bacteroidaceae                   | 0.08  | 0.45 |
| Thermaceae                       | 0.10  | 0.43 |
| Alteromonadaceae                 | 0.01  | 0.43 |
| Prevotellaceae                   | 0.19  | 0.42 |
| Pseudomonadaceae                 | 5.66  | 0.42 |
| Peptococcaceae                   | 0.00  | 0.40 |
| Rickettsiaceae                   | 5.14  | 0.40 |
| Pleomorphomonadaceae             | 0.14  | 0.40 |
| Pasteurellaceae                  | 0.05  | 0.39 |
| Succinivibrionaceae              | 0.02  | 0.39 |
| Rikenellaceae                    | 0.05  | 0.39 |
| Mollicutes RF39                  | 0.00  | 0.38 |
| Fusobacteriaceae                 | 0.06  | 0.38 |
| iammaproteobacteria Incertae Sed | 0.02  | 0.37 |
| Leptotrichiaceae                 | 0.00  | 0.36 |
| Desulfovibrionaceae              | 0.00  | 0.36 |
| 0319-6G20                        | 0.02  | 0.34 |
| Spirosomaceae                    | 0.01  | 0.33 |
| Gemmatimonadaceae                | 0.03  | 0.32 |
| Weeksellaceae                    | 0.16  | 0.32 |
| Peptostreptococcaceae            | 0.01  | 0.31 |

|                               |      |      |
|-------------------------------|------|------|
| Clostridiales vadinBB60 group | 0.01 | 0.31 |
| Legionellaceae                | 0.01 | 0.30 |
| Ruminococcaceae               | 0.16 | 0.29 |
| Deinococcaceae                | 0.01 | 0.29 |
| Anaerolineaceae               | 0.00 | 0.29 |
| Proteobacteria                | 0.00 | 0.28 |
| Clostridiaceae 2              | 0.01 | 0.27 |
| Campylobacteraceae            | 0.07 | 0.26 |
| Polyangiaceae                 | 0.00 | 0.26 |
| Shewanellaceae                | 0.00 | 0.26 |
| R7C24                         | 0.00 | 0.25 |
| A0839                         | 0.00 | 0.25 |
| Parachlamydiaceae             | 0.01 | 0.25 |
| Chitinophagaceae              | 0.02 | 0.25 |
| Spirochaetaceae               | 0.01 | 0.24 |
| Nitrospiraceae                | 0.00 | 0.24 |
| Family XI                     | 1.31 | 0.23 |
| Family XI                     | 0.01 | 0.23 |
| Dietziaceae                   | 0.00 | 0.23 |
| Tannerellaceae                | 0.00 | 0.22 |
| JG30-KF-CM45                  | 0.01 | 0.22 |
| WD260                         | 0.02 | 0.22 |
| Dysgonomonadaceae             | 0.00 | 0.21 |
| Cellvibrionaceae              | 0.00 | 0.20 |
| Leuconostocaceae              | 0.01 | 0.19 |
