# Supplementary material for: Anti-Tick Microbiota Vaccine Impacts Ixodes ricinus Performance during Feeding
Source: MDPI journal article supplement (doi:10.3390/vaccines8040702), 2020-11-21
Supplement: s1 [file s1]

| Family                | Relative abundance (%) | Eigencentality |
|-----------------------|------------------------|----------------|
| Pseudomonadaceae      | 19.42                  | 0.67           |
| Mitichloriaceae       | 17.05                  | 1.00           |
| Staphylococcaceae     | 10.80                  | 0.14           |
| Sphingomonadaceae     | 9.61                   | 0.40           |
| Enterobacteriaceae    | 5.36                   | 0.69           |
| Planococcaceae        | 4.98                   | 0.80           |
| Brevibacteriaceae     | 4.03                   | 0.32           |
| Moravellaceae         | 3.94                   | 0.63           |
| Burkholderiaceae      | 3.63                   | 0.12           |
| Sphingobacteriaceae   | 2.31                   | 0.63           |
| Wohlfahrtiimonadaceae | 2.14                   | 0.83           |
| Corynebacteriaceae    | 2.04                   | 0.85           |
| Micrococcaceae        | 1.87                   | 0.19           |
| Chitinophagaceae      | 1.59                   | 0.13           |
| Flavobacteriaceae     | 1.58                   | 0.33           |
| Dermbacteriaceae      | 1.48                   | 0.57           |
| Mitochondria          | 1.48                   | 0.39           |
| Xanthomonadaceae      | 1.22                   | 0.61           |
| Diplorickettsiaceae   | 0.95                   | 0.65           |
| Propionibacteriaceae  | 0.78                   | 0.71           |
| Dietziaceae           | 0.60                   | 0.19           |
| Hymenobacteraceae     | 0.55                   | 0.29           |
| Beijerinckiaceae      | 0.44                   | 0.70           |
| Rhizobiaceae          | 0.43                   | 0.63           |
| Neisseriaceae         | 0.36                   | 0.82           |
| Enterococcaceae       | 0.35                   | 0.42           |
| Nocardiaceae          | 0.26                   | 0.70           |
| Caulobacteraceae      | 0.23                   | 0.19           |
| Rhodobacteriaceae     | 0.23                   | 0.16           |
| Microbacteriaceae     | 0.20                   | 0.36           |
| Lactobacillaceae      | 0.07                   | 0.26           |
